# Supplementary material for: Many-body effects in an MXene Ti2CO2 monolayer modified by tensile strain: GW-BSE calculations
Source: Royal Society of Chemistry journal article supplement (doi:10.1039/c9na00632j), 2020-01-01
Supplement: c9na00632j1.pdf [file c9na00632j1.pdf]

## *Electronic Supplementary Information (ESI)*

### **Many-body effects in MXene Ti<sub>2</sub>CO<sub>2</sub> monolayer modified by tensile strain: GW-BSE calculations**

Yi-min Ding,<sup>a</sup> Xiaomin Nie,<sup>a</sup> Huilong Dong,<sup>b</sup> Nopporn Rujisamphan,<sup>c</sup> Youyong Li<sup>\*a</sup>

<sup>a</sup>Institute of Functional Nano & Soft Materials (FUNSOM), Jiangsu Key Laboratory for Carbon-Based Functional Materials & Devices, Soochow University, Suzhou, Jiangsu 215123, China.

<sup>b</sup>School of Chemistry and Materials Engineering, Changshu Institute of Technology, Changshu, Jiangsu 215500, China

<sup>c</sup>King Mongkut's University of Technology Thonburi (KMUTT), 126 Pracha Uthit Road, Bang Mod, Thung Khru, Bangkok 10140, Thailand \* Corresponding authors

E-mail: yyli@suda.edu.cn (Y. Li).

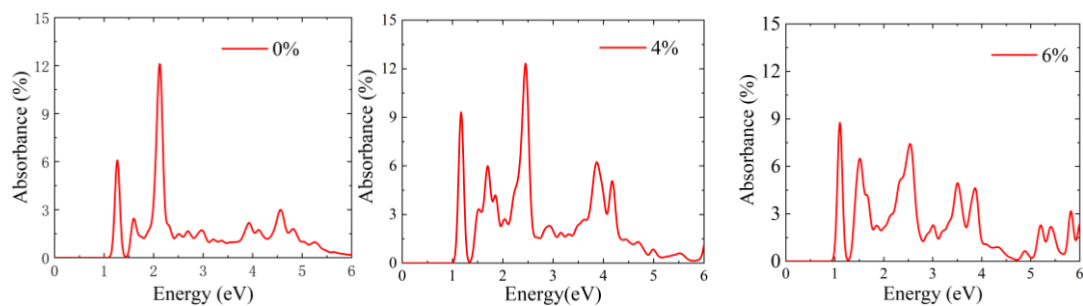

Fig. S1 Absorbance spectrum of Ti<sub>2</sub>CO<sub>2</sub> under tensile strains of 0%, 4% and 6%.
